# Supplementary material for: Shape-tunable Pt–Ir alloy nanocatalysts with high performance in oxygen electrode reactions
Source: Royal Society of Chemistry journal article supplement (doi:10.1039/c6nr08359e), 2016-12-05
Supplement: c6nr08359e1.pdf [file c6nr08359e1.pdf]

*Supporting Information for*

**Shape-tunable Pt-Ir Alloy Nanocatalysts with High Performance in Oxygen Electrode Reactions**

Tao Zhang, Shuai-Chen Li, Wei Zhu, Zhi-Ping Zhang, Jun Gu and Ya-Wen Zhang\*

*Beijing National Laboratory for Molecular Sciences, State Key Laboratory of Rare Earth Materials Chemistry and Applications, PKU-HKU Joint Laboratory in Rare Earth Materials and Bioinorganic Chemistry, College of Chemistry and Molecular Engineering, Peking University, Beijing 100871, China. Fax: +86-10-62756787; E-mail: ywzhang@pku.edu.cn.*

**Table S1.** Surface atomic ratios, proportions of oxidation states and OER mass activities of Pt-Ir NOs with different annealing temperatures.

| Sample | Pt (%) | Ir (%) | Pt <sup>n+</sup> /Pt (%) | Ir <sup>n+</sup> /Ir (%) | Mass activity (A g <sup>-1</sup> ) |
|--------|--------|--------|--------------------------|--------------------------|------------------------------------|
| NO-300 | 68.3   | 31.7   | 44.1                     | 68.2                     | 15.7                               |
| NO-350 | 70.9   | 29.1   | 50.1                     | 78.8                     | 21.3                               |
| NO-400 | 69.4   | 30.6   | 67.9                     | 100.0                    | 27.9                               |

**Table S2.** Surface atomic ratios of Pt-Ir alloy nanocrystals after annealing or working potential treatment determined from XPS analysis.

| Sample (%) | Annealed |      | Treated |      |
|------------|----------|------|---------|------|
|            | Pt       | Ir   | Pt      | Ir   |
| NO         | 74.5     | 25.5 | 70.9    | 29.1 |
| NTO        | 70.4     | 29.6 | 68.7    | 31.3 |
| NC         | 76.3     | 23.7 | 83.1    | 16.9 |
| NSC        | 65.6     | 34.4 | 62.4    | 37.6 |
| NW         | 74.1     | 25.9 | 70.8    | 29.2 |

**Table S3.** Electrochemically active surface area (ECSA) from the Cu-UPD and high frequency impedance of the catalysts.

| Sample | ECSA (m <sup>2</sup> g <sup>-1</sup> ) | R (Ω) | Sample    | ECSA (m <sup>2</sup> g <sup>-1</sup> ) | R (Ω) |
|--------|----------------------------------------|-------|-----------|----------------------------------------|-------|
| NO     | 25.5                                   | 4.0   | NW        | 7.5                                    | 4.1   |
| NTO    | 20.4                                   | 4.0   | Ir/C      | 23.3                                   | 4.1   |
| NC     | 25.7                                   | 4.0   | Pt/C      | 64.8                                   | 3.7   |
| NSC    | 11.6                                   | 4.1   | Pt/C-Ir/C | 48.9                                   | 4.0   |

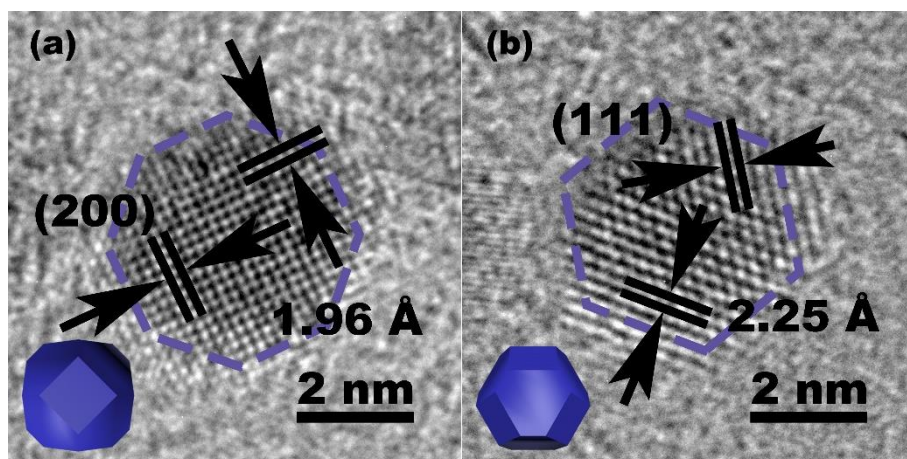

**Fig. S1.** HRTEM images of Pt-Ir alloy NTOs from the (a) (100) and (b) (111) facets view.

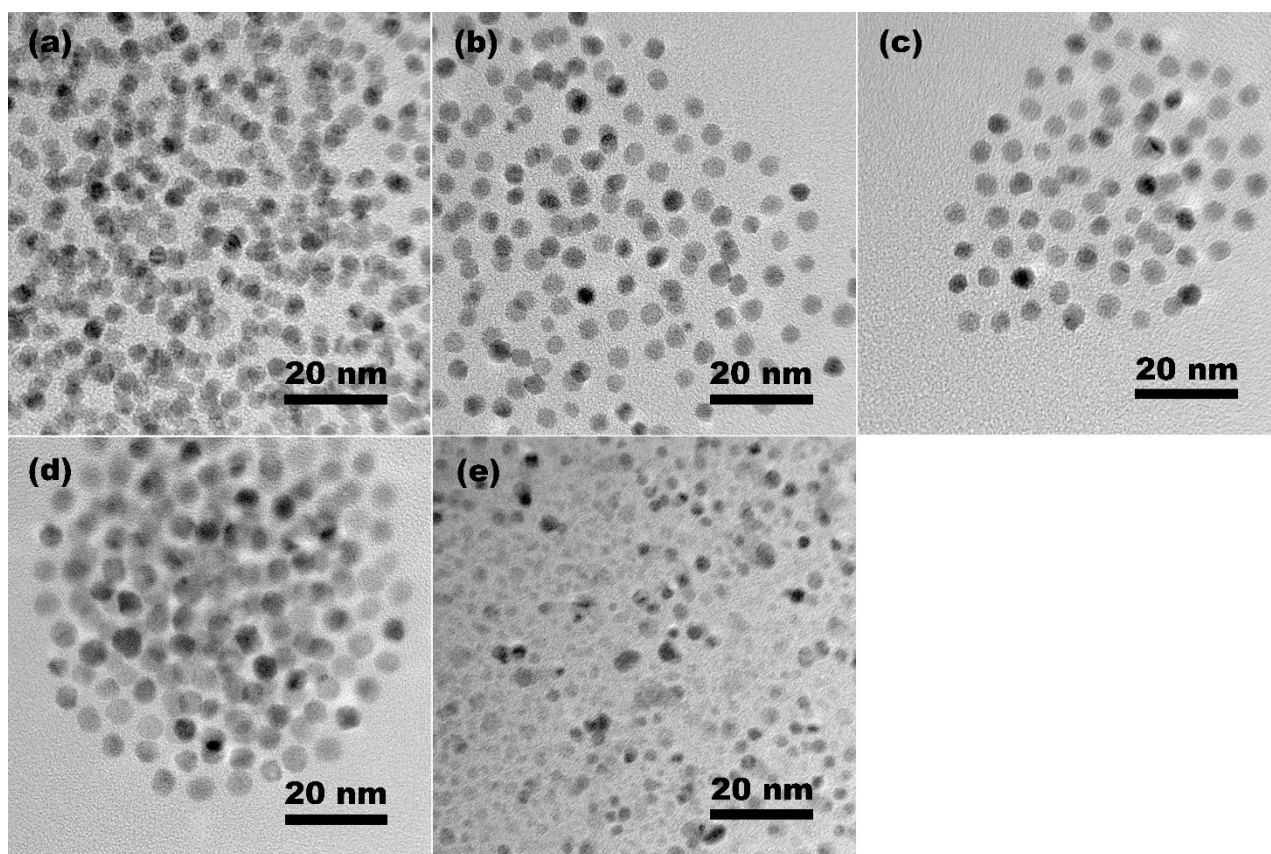

**Fig. S2.** TEM images of Pt-Ir nanoparticles obtained with different amounts of KBr: (a) without KBr, (b) 70 mg, (c) 700 mg, (d) 1400 mg. (e) TEM images of Pt-Ir nanoparticles obtained with 99 mg of TEAC. All the other conditions were the same as those of Pt-Ir alloy single-crystalline nanocrystals.

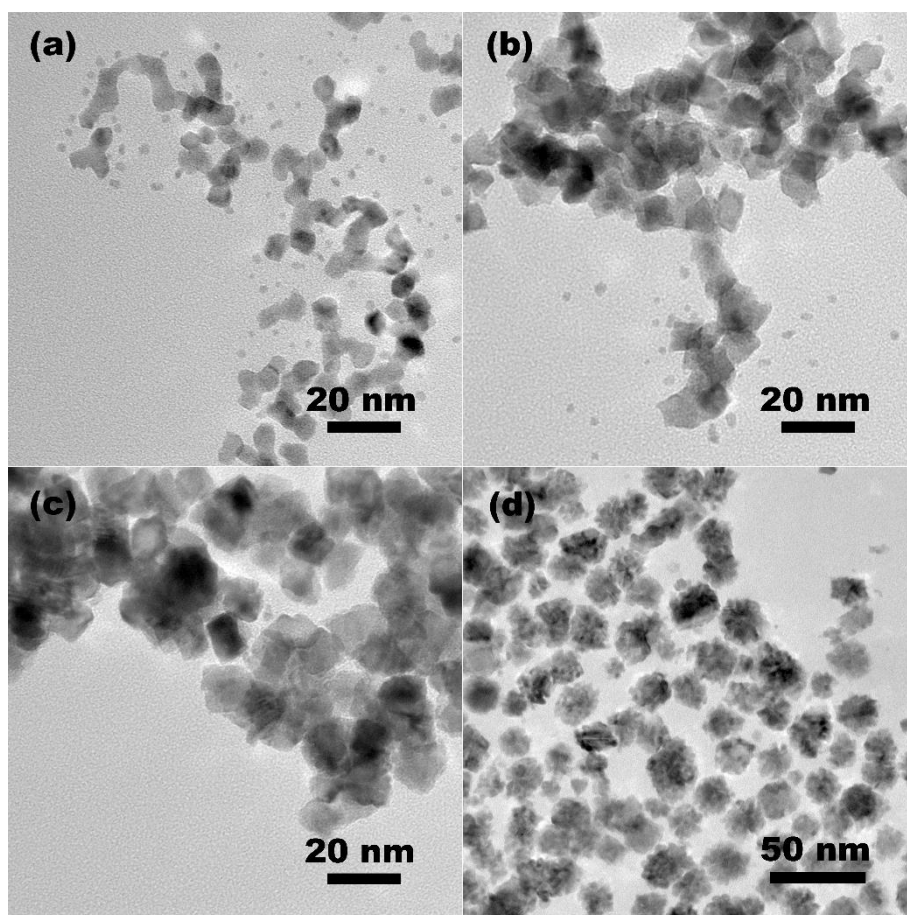

**Fig. S3.** TEM images of Pt-Ir nanoparticles obtained under different reaction conditions: (a) with 4 mg KI (b) with 20 mg KI (c) with 100 mg KI (d) with 500 mg KI. All the other conditions were the same as those of Pt-Ir alloy single-crystalline nanocrystals.

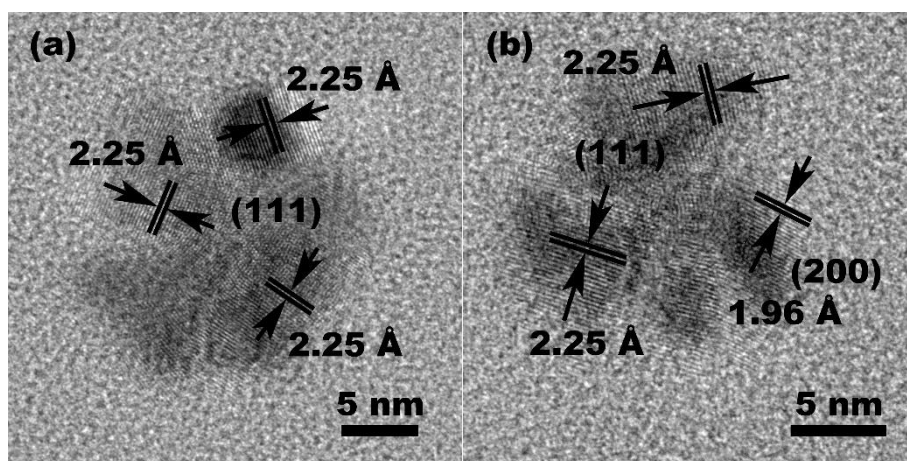

**Fig. S4.** HRTEM images of as-synthesized Pt-Ir NCFs.



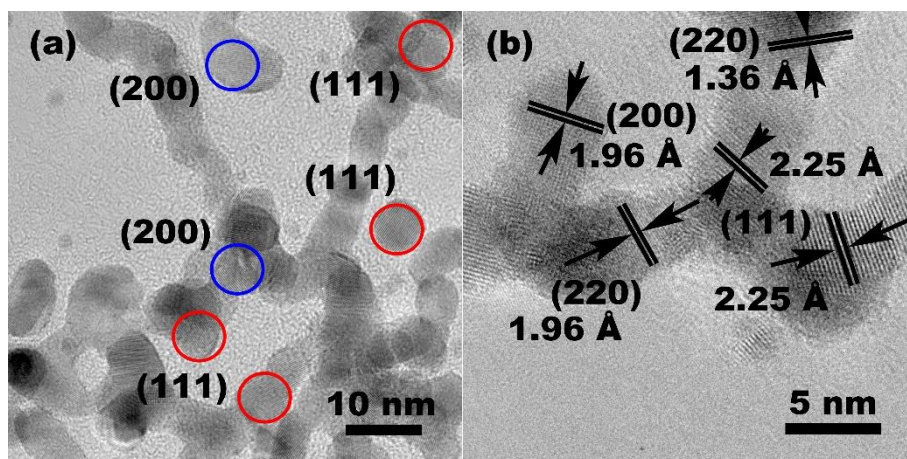

**Fig. S5.** HRTEM images of as-synthesized Pt-Ir worm-like NWs.

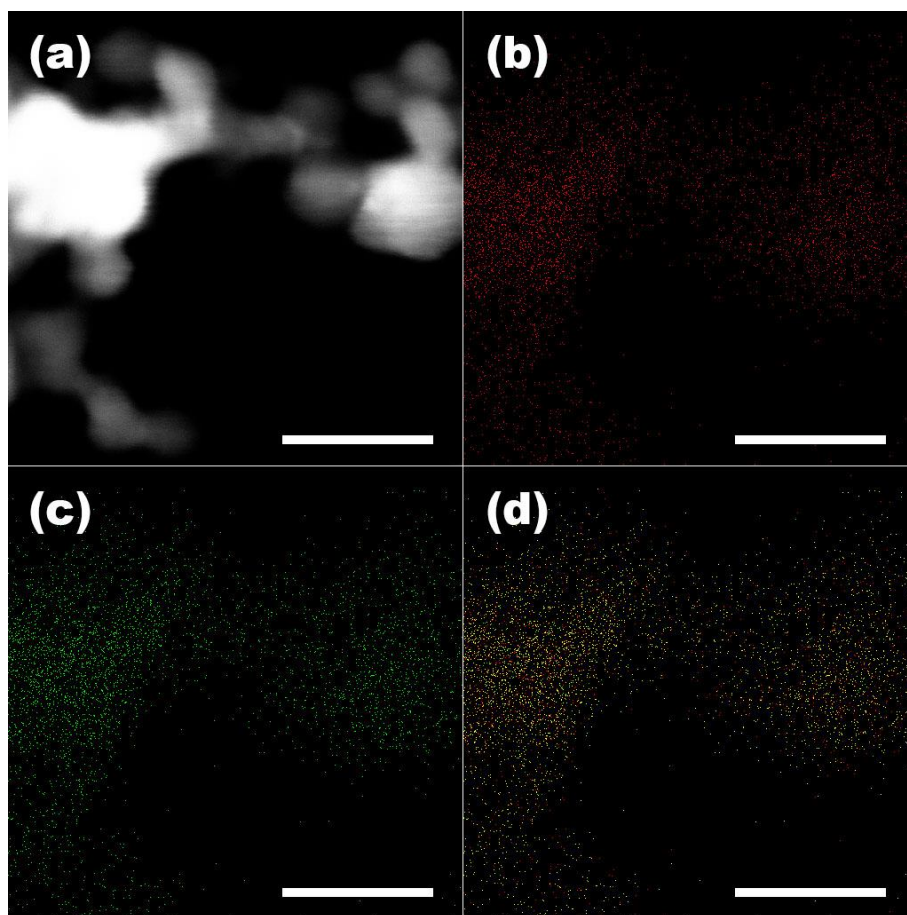

**Fig. S6.** HAADF-STEM image (a) and EDS mapping images: (b) Pt, (c) Ir, (d) overlay of as-synthesized Pt-Ir worm-like NWs with the scale bar of 20 nm.

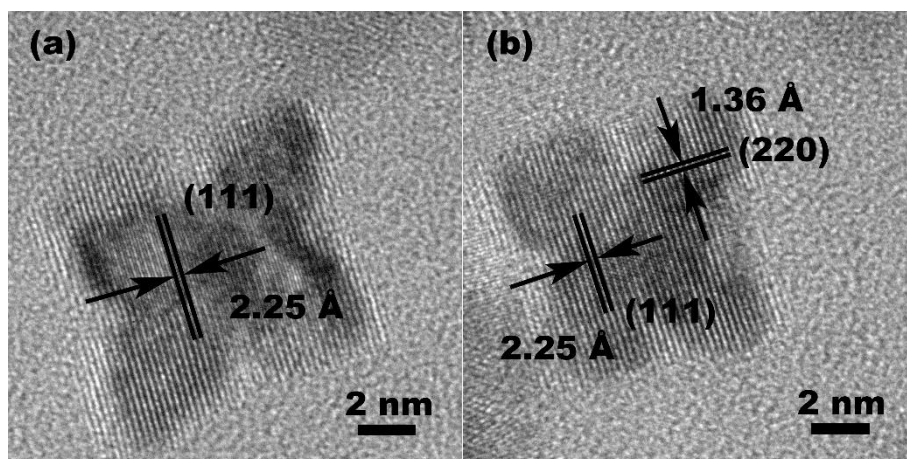

**Fig. S7.** HRTEM images of as-synthesized Pt-Ir NOSs.

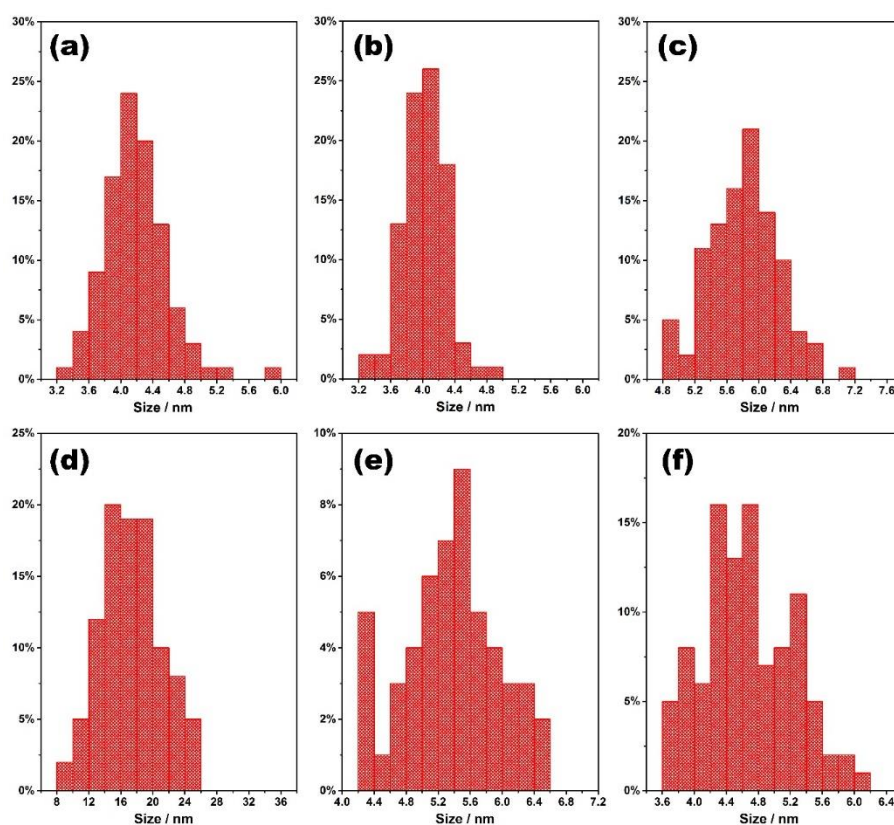

**Fig. S8.** Particle size statistics for as-synthesized Pt-Ir alloy nanocrystals: (a) NOs, (b) NTOs, (c) NCs, (d) NCFs, (e) NWs, and (f) NOSs.

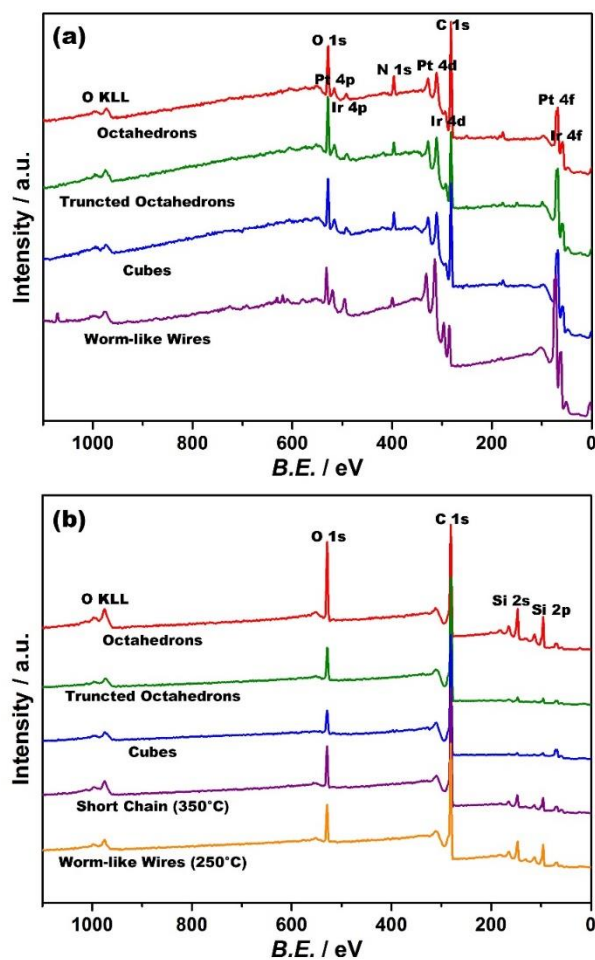

**Fig. S9.** XPS full spectra of Pt-Ir alloy nanocrystals (a) before and (b) after the annealing treatment.

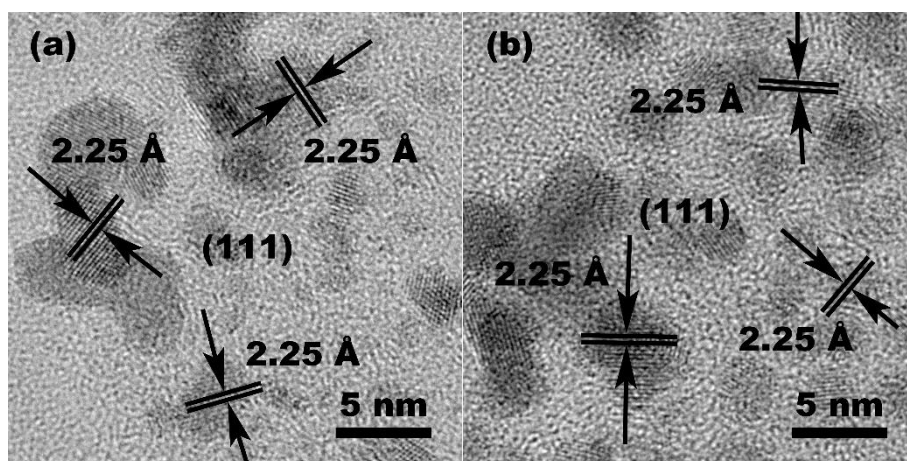

**Fig. S10.** HRTEM images of commercial Pt/C catalyst.



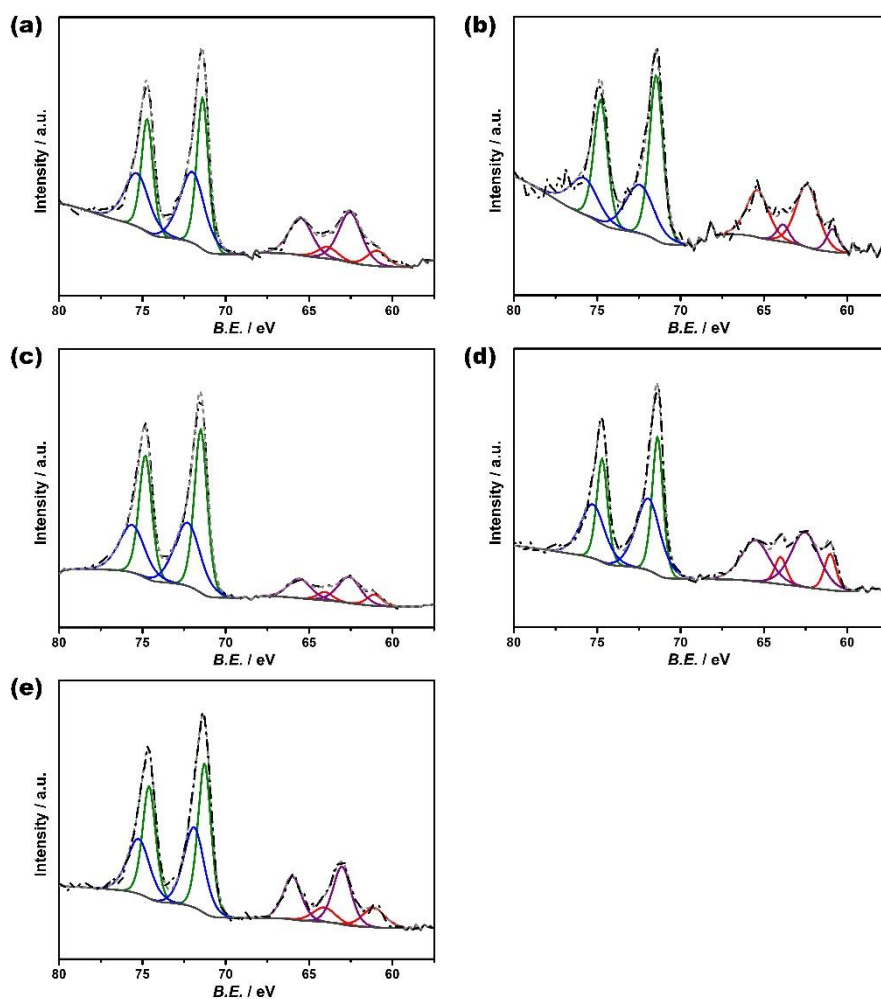

**Fig. S11.** XPS spectra of Pt-Ir alloy nanocrystals in Pt and Ir 4f regions after a working potential treatment at 1.479 V: (a) NOs, (b) NTOs, (c) NCs, (d) NSCs, and (e) NWs.

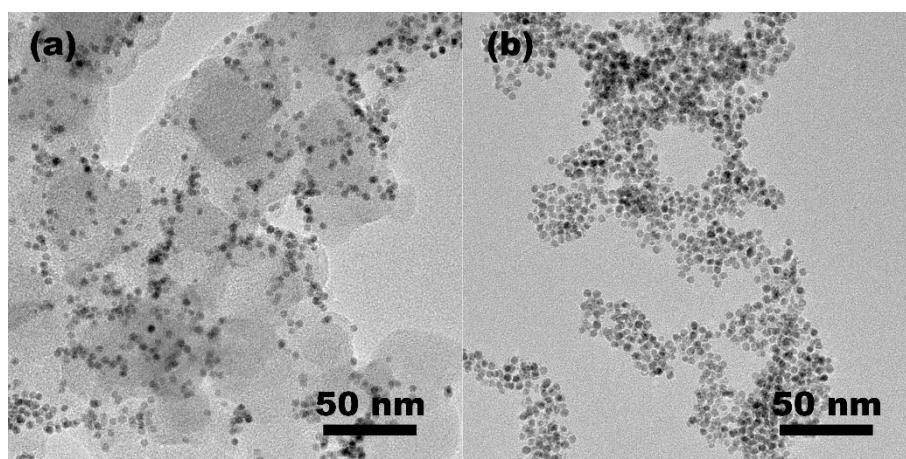

**Fig. S12.** TEM images for Pt-Ir NOs catalyst with different annealing temperatures: (a) NO-300, (b) NO-400.

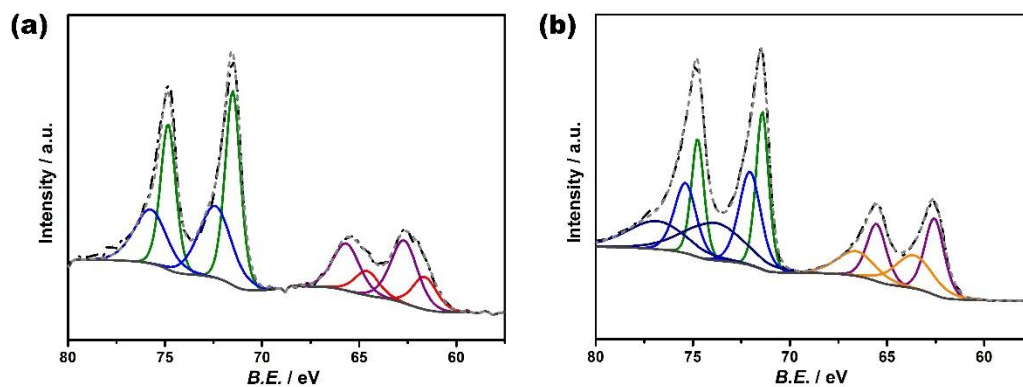

**Fig. S13.** XPS spectra of Pt-Ir NOs in Pt and Ir 4f regions after a working potential treatment at 1.479 V: (a) NO-300, (b) NO-400.

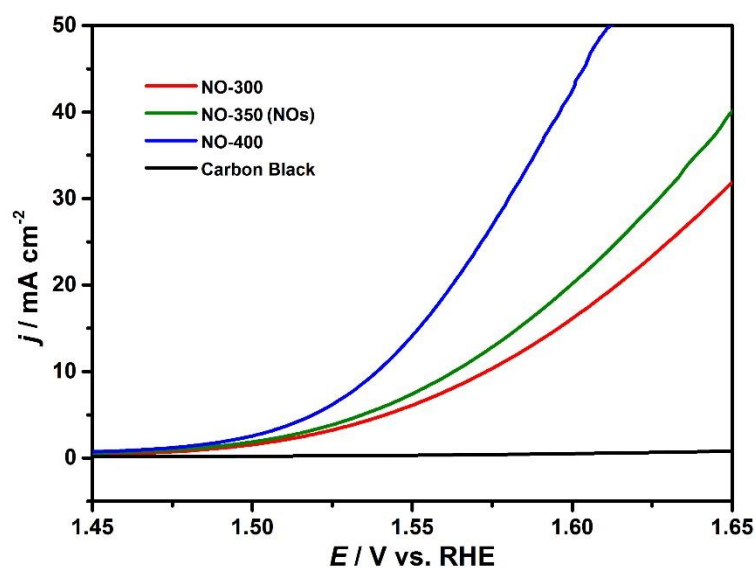

**Fig. S14.** IR-compensated polarization curves of carbon black and Pt-Ir NOs with different annealing temperatures in a  $\text{N}_2$ -saturated  $0.5 \text{ mol L}^{-1} \text{H}_2\text{SO}_4$  electrolyte with a rotation rate of 1600 rpm at a sweep rate of  $10 \text{ mV s}^{-1}$ .



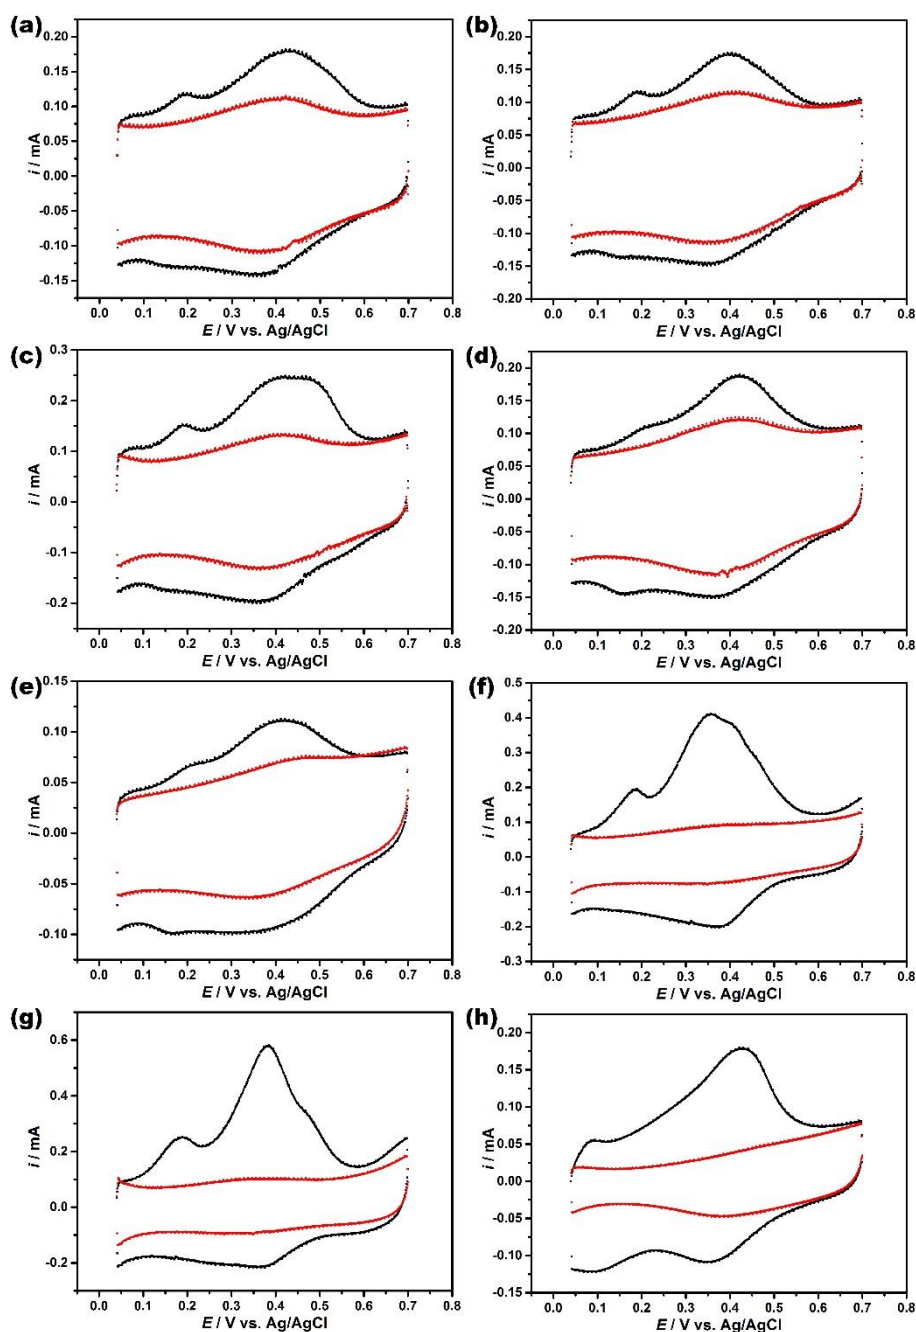

**Fig. S15.** Cu-UPD stripping curves measured at 0.3 V for 100 s in 2 mmol L<sup>-1</sup> CuSO<sub>4</sub> and 0.5 mol L<sup>-1</sup> H<sub>2</sub>SO<sub>4</sub> solution (black curves) or 0.5 mol L<sup>-1</sup> H<sub>2</sub>SO<sub>4</sub> solution (red curves), followed by the collection of CV curves from 0.04 V to 0.7 V vs. Ag/AgCl with the sweep rate of 50 mV s<sup>-1</sup>: (a) NOs, (b) NTOs, (c) NCs, (d) NSCs, (e) NWs, (f) Pt/C-Ir/C mixture, (g) commercial Pt/C catalyst, and (h) commercial Ir/C catalyst. The ECSA of the sample was calculated from the stripping charge with the coefficient of 420  $\mu\text{C}\cdot\text{cm}^{-2}$ .

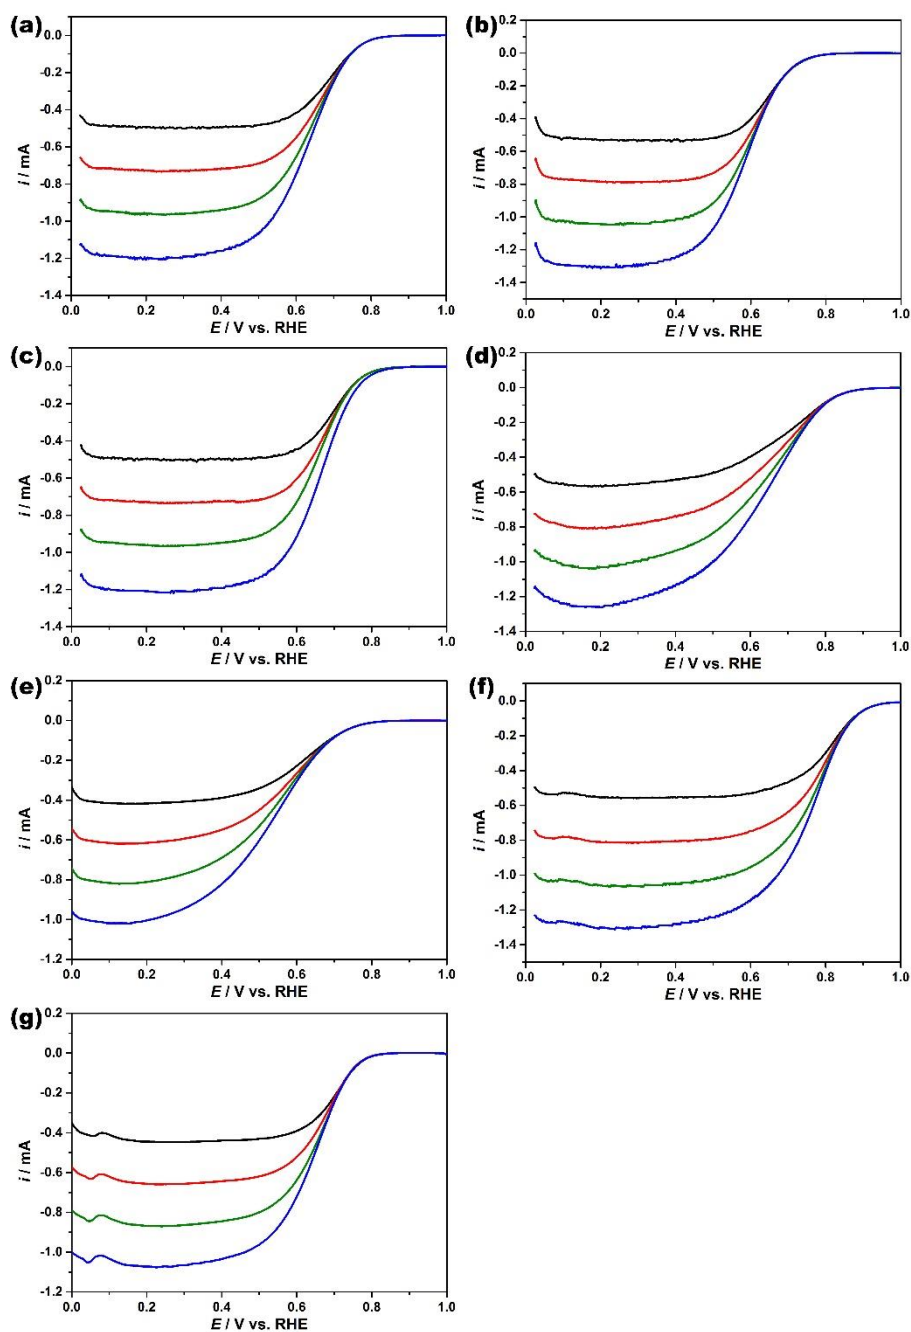

**Fig. S16.** Polarization curves for ORR on carbon black supported Pt-Ir alloy nanocatalysts and commercial Pt/C catalyst with different rotations (black: 400 rpm; red: 900 rpm; green: 1600 rpm; blue: 2500 rpm): (a) NOs, (b) NTOs, (c) NCs, (d) NSCs, (e) NWs, (f) commercial Pt/C catalyst, and (g) Pt/C-Ir/C mixture.

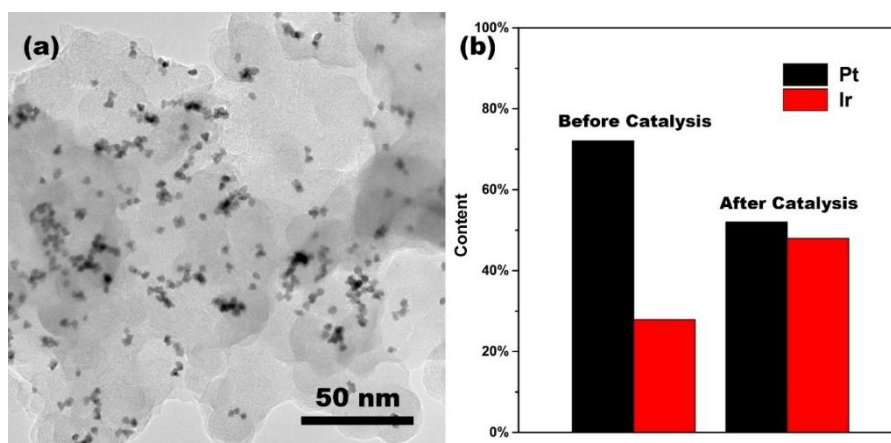

**Fig. S17.** TEM image (a) of Pt-Ir NSCs after 5000 cycles of voltage sweeps in the range of 0.6-1.0 V vs. RHE with a scan speed of  $200 \text{ mV s}^{-1}$  in  $\text{O}_2$ -saturated  $\text{mol L}^{-1} \text{H}_2\text{SO}_4$  electrolyte. (b) Comparison of atomic content of Pt-Ir NSCs (from EDS) before and after the voltage sweeps.
